# Supplementary material for: Metabolomic Signature in Sera of Multiple Sclerosis Patients during Pregnancy
Source: PubMed Central journal article supplement (PMC6274842; doi:10.3390/ijms19113589), 2018-11-14
Supplement: ijms-19-03589-s001.pdf [file ijms-19-03589-s001.pdf]

## **Metabolomic signature in sera of Multiple Sclerosis patients during pregnancy**

Claudia Rossi<sup>1,2</sup>, Ilaria Cicalini<sup>1,2</sup>, Mirco Zucchelli<sup>1,2</sup>, Maria di Ioia<sup>3</sup>, Marco Onofri<sup>3</sup>, Luca Federici<sup>1,2</sup>, Piero Del Boccio<sup>2,4</sup> and Damiana Pieragostino<sup>1,2,\*</sup>

<sup>1</sup>*Department of Medical, Oral and Biotechnological Sciences, “G. d’Annunzio” University of Chieti-Pescara, Chieti, Italy.* <sup>2</sup>*Analytical Biochemistry and Proteomics Laboratory, Research Centre on Aging and Translational Medicine (Ce.S.I-MeT), University “G. d’Annunzio” of Chieti-Pescara, Chieti, Italy* <sup>3</sup>*Department of Neurosciences and Imaging, University “G. d’Annunzio” of Chieti-Pescara, Chieti, Italy*

<sup>4</sup>*Department of Pharmacy, University “G. d’Annunzio” of Chieti-Pescara, Chieti, Italy*

\*Corresponding Author:

Damiana Pieragostino,

PhD

Analytical Biochemistry and Proteomics Laboratory,

Research Centre on Aging and Translational Medicine (Ce.S.I-MeT)

“G. d’Annunzio” University of Chieti, Via Luigi Polacchi 66100 Chieti, Italy E-mail:

[dpieragostino@unich.it](mailto:dpieragostino@unich.it) Phone: +39 0871 541596 Fax: +39 0871 5411

Table S1: Table reports Rank correlation between PROG and all the metabolites quantified in the study using GraphPad Prism, by a Spearman non-parametric correlation test. The P-value and the related R2 are reported in the Table for each correlation. Significant P-value are in bold. \* Indicates the metabolites which showed the best correlations with PROG.

|                         | <b>P-value</b>     | <b>R2</b>         |
|-------------------------|--------------------|-------------------|
| <b>SM(d18:0/22:2OH)</b> | <b>0.000233872</b> | <b>-0.5565466</b> |
| <b>SM(d18:1/22:1)</b>   | <b>0.000419227</b> | <b>-0.5313177</b> |
| <b>SM(d18:0/22:0) *</b> | <b>0.00118983</b>  | <b>-0.5000256</b> |
| <b>Sa *</b>             | <b>0.01065382</b>  | <b>0.3900909</b>  |
| So                      | 0.1030722          | 0.2550533         |
| So1P                    | 0.1385614          | 0.2324206         |
| Sa1P                    | 0.7329037          | -0.05425701       |
| <b>C16Cer *</b>         | <b>0.02537462</b>  | <b>0.3447216</b>  |
| C16dHCer                | 0.2012269          | 0.2012581         |
| <b>C18Cer</b>           | <b>0.03145823</b>  | <b>0.3324681</b>  |
| <b>C16GlcCer *</b>      | <b>3.73325E-07</b> | <b>0.6926081</b>  |
| C22Cer                  | 0.3074177          | -0.1613245        |
| C24Cer                  | 0.1546681          | -0.2235659        |
| C24dHCer                | 0.1951887          | 0.2039278         |
| ALA                     | 0.4303731          | -0.1249697        |
| <b>ARG</b>              | <b>0.04165123</b>  | <b>-0.3157514</b> |
| <b>CIT</b>              | <b>0.009835111</b> | <b>-0.3939792</b> |
| <b>GLNLYS</b>           | <b>0.002104789</b> | <b>-0.4613329</b> |
| GLU                     | 0.09199832         | -0.263329         |
| <b>GLY</b>              | <b>0.00164687</b>  | <b>-0.4709086</b> |
| <b>LEU/ILE/PRO-OH</b>   | <b>0.02541142</b>  | <b>-0.3446405</b> |
| <b>MET</b>              | <b>0.04071935</b>  | <b>-0.3171309</b> |
| <b>ORN</b>              | <b>0.000776151</b> | <b>-0.4986616</b> |
| PHE                     | 0.687072           | -0.06402668       |
| <b>PRO</b>              | <b>0.01759879</b>  | <b>-0.3646032</b> |
| <b>TYR *</b>            | <b>1.51946E-05</b> | <b>-0.6141368</b> |
| <b>VAL</b>              | <b>0.002495868</b> | <b>-0.4545164</b> |
| SA                      | 0.9170961          | -0.01656047       |
| <b>C0 *</b>             | <b>2.01988E-09</b> | <b>-0.7727834</b> |
| <b>C2</b>               | <b>5.54504E-07</b> | <b>-0.6852512</b> |
| <b>C3</b>               | <b>4.26248E-05</b> | <b>-0.5877723</b> |
| <b>C4</b>               | <b>0.002386757</b> | <b>-0.4563178</b> |
| C4DC\C5OH               | 0.07914212         | -0.273966         |
| <b>C5</b>               | <b>0.003590937</b> | <b>-0.4394861</b> |
| C5:1                    | 0.3344819          | -0.1526537        |
| C5DC\C6OH               | 0.8729983          | 0.02542902        |
| <b>C6DC</b>             | <b>0.01063388</b>  | <b>-0.3901825</b> |
| C8                      | 0.2438052          | -0.1838553        |
| <b>C8:1</b>             | <b>0.02126855</b>  | <b>-0.35446</b>   |
| C10                     | 0.3384958          | -0.1514056        |
| C10:1                   | 0.5499362          | -0.09490666       |
| C10:2                   | 0.161919           | -0.2197994        |
| C12                     | 0.4372343          | -0.1231327        |
| C12:1                   | 0.7072321          | -0.05970265       |
| C14                     | 0.07657495         | -0.2762495        |
| C14:1                   | 0.2298096          | -0.1893272        |
| C14:2                   | 0.3231024          | 0.1562437         |
| <b>C16</b>              | <b>0.007240189</b> | <b>-0.4084737</b> |
| C16:1                   | 0.1217909          | -0.2424924        |
| <b>C18</b>              | <b>0.01826321</b>  | <b>-0.3626425</b> |
| <b>C18:1</b>            | <b>0.007500257</b> | <b>-0.4068351</b> |
| <b>C18:2</b>            | <b>0.01083267</b>  | <b>-0.3892756</b> |

|                  |                    |                   |
|------------------|--------------------|-------------------|
| C24              | 0.6924239          | 0.06287444        |
| C26              | 0.3936955          | -0.1350826        |
| <b>C20:0-LPC</b> | <b>0.000324744</b> | <b>-0.5281254</b> |
| <b>C22:0-LPC</b> | <b>0.00902675</b>  | <b>-0.3981006</b> |

Table S2:

| <b>Samples Code</b> | <b>Pregnancy</b> | <b>Age</b> | <b>EDSS during pregnancy</b> | <b>Post-Partum Relapses</b> | <b>Post-Partum EDDS</b> |
|---------------------|------------------|------------|------------------------------|-----------------------------|-------------------------|
| SM01                | First            | 31         | 1                            | no                          | 1                       |
| SM02                | Twins            | 33         | nd                           | nd                          | nd                      |
| SM03                | First            | 30         | nd                           | nd                          | nd                      |
| SM04                | First            | 32         | 2                            | yes                         | 2                       |
| SM05                | First            | 32         | 1.0                          | yes                         | 1                       |
| SM06                | Second           | 32         | 4                            | yes                         | 6                       |
| SM07                | First            | 26         | 1                            | no                          | 1                       |
| SM08                | Second           | 34         | 2                            | no                          | 2.5                     |
| SM09                | First            | 37         | 2                            | yes                         | 3.5                     |
| SM10                | First            | 30         | 1                            | no                          | 1                       |
| SM11                | First            | 37         | 1.5                          | no                          | 1.5                     |
| SM12                | First            | 26         | 3.5                          | no                          | 2.5                     |

Table S2: Clinical Details of enrolled patients: nd :Not determined ; EDSS (Expanded Disability Status Scale)

Table S3

| Analyte  | Calibration Levels ( $\mu\text{M}$ ) |        |        |       |       |       |       | QC Levels ( $\mu\text{M}$ ) |       |       |
|----------|--------------------------------------|--------|--------|-------|-------|-------|-------|-----------------------------|-------|-------|
|          | L1                                   | L2     | L3     | L4    | L5    | L6    | L7    | QC1                         | QC2   | QC3   |
| CORT     | 0.004                                | 0.01   | 0.023  | 0.05  | 0.14  | 0.35  | 0.88  | 0.012                       | 0.06  | 0.44  |
| CCONE    | 0.0008                               | 0.002  | 0.005  | 0.011 | 0.03  | 0.072 | 0.18  | 0.002                       | 0.01  | 0.09  |
| 11-DECOL | 0.0002                               | 0.0005 | 0.0015 | 0.003 | 0.008 | 0.020 | 0.052 | 0.0007                      | 0.003 | 0.025 |
| ADIONE   | 0.0002                               | 0.0006 | 0.0017 | 0.004 | 0.01  | 0.025 | 0.063 | 0.0008                      | 0.004 | 0.03  |
| TESTO    | 0.0001                               | 0.0002 | 0.0007 | 0.001 | 0.004 | 0.010 | 0.025 | 0.00035                     | 0.001 | 0.01  |
| 17-OHP   | 0.0003                               | 0.0008 | 0.002  | 0.005 | 0.013 | 0.032 | 0.078 | 0.001                       | 0.005 | 0.04  |
| PROG     | 0.0003                               | 0.0009 | 0.002  | 0.005 | 0.013 | 0.033 | 0.084 | 0.001                       | 0.005 | 0.04  |

Table S3: Concentration levels ( $\mu\text{M}$ ) for calibrators and QC materials of each steroid monitored in the LC-MS/MS method of analysis are summarized

Table S4:

| Analyte   | Calibration Levels ( $\mu\text{M}$ ) |        |       |       |      |      |      | QC Levels ( $\mu\text{M}$ ) |      |      |
|-----------|--------------------------------------|--------|-------|-------|------|------|------|-----------------------------|------|------|
|           | L1                                   | L2     | L3    | L4    | L5   | L6   | L7   | QC1                         | QC2  | QC3  |
| Sa        | 0.0003                               | 0.0016 | 0.003 | 0.016 | 0.03 | 0.08 | 0.16 | 0.002                       | 0.03 | 0.14 |
| So        | 0.0006                               | 0.016  | 0.003 | 0.016 | 0.03 | 0.08 | 0.16 | 0.002                       | 0.03 | 0.14 |
| So1P      | 0.0026                               | 0.026  | 0.13  | 0.26  | 0.40 | 0.65 | 0.92 | 0.1                         | 0.33 | 0.78 |
| Sa1P      | 0.0026                               | 0.026  | 0.13  | 0.26  | 0.40 | 0.65 | 0.92 | 0.1                         | 0.33 | 0.78 |
| C16Cer    | 0.02                                 | 0.093  | 0.18  | 0.28  | 0.37 | 0.46 | 0.55 | 0.14                        | 0.31 | 0.47 |
| C16dHCer  | 0.02                                 | 0.092  | 0.18  | 0.28  | 0.37 | 0.46 | 0.55 | 0.14                        | 0.35 | 0.47 |
| C18Cer    | 0.02                                 | 0.088  | 0.18  | 0.26  | 0.35 | 0.44 | 0.53 | 0.13                        | 0.30 | 0.45 |
| C16GlcCer | 0.0015                               | 0.014  | 0.07  | 0.14  | 0.21 | 0.28 | 0.35 | 0.05                        | 0.18 | 0.42 |
| C22Cer    | 0.08                                 | 0.16   | 0.32  | 0.80  | 0.96 | 1.28 | 1.60 | 0.24                        | 0.82 | 1.36 |
| C24Cer    | 0.08                                 | 0.15   | 0.30  | 0.80  | 0.92 | 1.23 | 1.5  | 0.23                        | 0.78 | 1.30 |
| C24dHCer  | 0.015                                | 0.07   | 0.15  | 0.23  | 0.30 | 0.38 | 0.5  | 0.11                        | 0.26 | 0.39 |

Table S4: Concentration levels ( $\mu\text{M}$ ) for calibrators and QC materials of each sphingolipids and ceramides monitored in the LC-MS/MS method of analysis are summarized.

Table S5:

| <b>MRM<br/>Function</b> | <b>Analyte</b>                  | <b>Transitions<br/>(<i>m/z</i>)</b> | <b>Cone<br/>Volts</b> | <b>Coll Energy<br/>(eV)</b> |
|-------------------------|---------------------------------|-------------------------------------|-----------------------|-----------------------------|
|                         | E2                              | 506.2 > 171.1                       | 110                   | 32                          |
|                         | <sup>2</sup> H <sub>4</sub> -E2 | 510.2 > 171.1                       | 110                   | 32                          |
|                         | E1                              | 504.2 > 171.1                       | 110                   | 32                          |
|                         | <sup>2</sup> H <sub>4</sub> -E1 | 508.2 > 171.1                       | 110                   | 32                          |

**Table S5.** MS/MS operating conditions. Multiple reaction monitoring(MRM) functions and settings for detection of estrogens are shown.

Table S6:

| MRM Function | Time window (min) | Analyte     | Transitions (m/z) | Cone Volts | Coll Energy (eV) |
|--------------|-------------------|-------------|-------------------|------------|------------------|
| 1            | 3-7               | Sa          | 302.3 > 284.2     | 14         | 50               |
|              |                   | d 17:0 Sa   | 288.2 > 270.2     | 14         |                  |
| 2            | 3-7               | So          | 300.2 > 282.2     | 10         | 50               |
|              |                   | d 17:1 So   | 286.2 > 268.2     | 11         |                  |
| 3            | 4-8,5             | Sa1P        | 382.2 > 284.2     | 13         | 50               |
|              |                   | d 17:0 Sa1P | 368.2 > 270.2     | 13         |                  |
| 4            | 4,5-10            | So1P        | 380.2 > 264.2     | 15         | 50               |
|              |                   | d 17:1 So1P | 366.2 > 250.2     | 15         |                  |
| 5            | 7-13,5            | C16Cer      | 538.4 > 264.2     | 19         | 50               |
|              |                   | C17Cer      | 552.5 > 264.2     | 18         |                  |
|              |                   | C18Cer      | 566.5 > 264.2     | 21         |                  |
|              |                   | C16dHCer    | 540.5 > 522.5     | 18         |                  |
|              |                   | C16GlcCer   | 700.5 > 520.4     | 15         |                  |
|              |                   | C17GlcCer   | 714.6 > 264.2     | 18         |                  |
| 6            | 12-20             | C22Cer      | 622.5 > 264.2     | 23         | 50               |
|              |                   | C24Cer      | 650.6 > 264.2     | 22         |                  |
|              |                   | C24dHCer    | 652.5 > 634.7     | 23         |                  |

**Table S6.** MS/MS operating conditions. Multiple reaction monitoring(MRM) functions and settings for detection of sphingolipids and ceramides are shown.

Table S7:

| Abbreviation Amino acids and Internal Standards                          | Amino acids                                                                        | Transition                                           | Cone potential | Collision energy |
|--------------------------------------------------------------------------|------------------------------------------------------------------------------------|------------------------------------------------------|----------------|------------------|
| Ala<br><sup>2</sup> H <sub>3</sub> -Ala                                  | Alanine                                                                            | 90.1>44.0<br>93.1>47.1                               | 22             | 8                |
| Arg<br><sup>2</sup> H <sub>4</sub> , <sup>13</sup> C-Arg                 | Arginine                                                                           | 175.1>70.1<br>180.1>75.1                             | 34             | 21               |
| Asa<br><sup>2</sup> H <sub>4</sub> , <sup>13</sup> C-Arg                 | Argininosuccinic acid                                                              | 291.1>70.1<br>180.1>75.1                             | 42<br>34       | 30<br>21         |
| Cit<br><sup>2</sup> H <sub>2</sub> -Cit                                  | Citrulline                                                                         | 176.1>113.1<br>178.1>115.1                           | 24             | 16               |
| Gly<br><sup>15</sup> N, <sup>2</sup> - <sup>13</sup> C-Gly               | Glycine                                                                            | 76.0>30.0<br>78.0>32.0                               | 22             | 7                |
| Leu/Ile/Pro-OH<br><sup>2</sup> H <sub>3</sub> -Leu                       | Leucine/Isoleucine/Hydroxyproline                                                  | 132.1>86.1<br>135.1>89.1                             | 24             | 10               |
| Met<br><sup>2</sup> H <sub>3</sub> -Met                                  | Methionine                                                                         | 150.1>104.1<br>153.1>107.1                           | 24             | 10               |
| Orn<br><sup>2</sup> H <sub>6</sub> -Orn                                  | Ornithine                                                                          | 133.1>70.1<br>139.1>76.1                             | 22             | 16               |
| Phe<br><sup>13</sup> C <sub>6</sub> -Phe                                 | Phenylalanine                                                                      | 166.1>120.1<br>172.1>126.1                           | 25             | 12               |
| Tyr<br><sup>13</sup> C <sub>6</sub> -Tyr                                 | Tyrosine                                                                           | 182.1>136.1<br>188.1>142.1                           | 26             | 12               |
| Val<br><sup>15</sup> N, <sup>2</sup> - <sup>13</sup> C <sub>5</sub> -Val | Valine                                                                             | 118.1>72.1<br>124.1>77.1                             | 23             | 10               |
| Pro<br><sup>13</sup> C <sub>5</sub> -Pro                                 | Proline                                                                            | 116.1>70.1<br>121.1>74.1                             | 28             | 12               |
| Gln/Lys<br><sup>13</sup> C <sub>5</sub> -Gln                             | Glutamine/Lysine                                                                   | 147.1>84.0<br>152.1>88.1                             | 22             | 16               |
| Glu<br><sup>13</sup> C <sub>5</sub> -Gln                                 | Glutamic acid                                                                      | 148.1>84.0<br>152.1>88.1                             | 24<br>22       | 14<br>16         |
| Abbreviation Acylcarnitines and Internal Standards                       | Acylcarnitines                                                                     | Transition                                           | Cone potential | Collision energy |
| C0<br><sup>2</sup> H <sub>9</sub> -C0                                    | Free Carnitine                                                                     | 162.1>1030<br>171.2>103.0                            | 38             | 16               |
| C2<br><sup>2</sup> H <sub>3</sub> -C0                                    | Acetylcarnitine                                                                    | 204.1>85.0<br>207.1>85.0                             | 34             | 18               |
| C3<br><sup>2</sup> H <sub>3</sub> -C3                                    | Propionylcarnitine                                                                 | 218.1>85.0<br>221.2>85.0                             | 32             | 18               |
| C4<br><sup>2</sup> H <sub>3</sub> -C4                                    | Butyrylcarnitine/Malonylcarnitine/3-Hydroxybutyrylcarnitine                        | 232.2>85.0<br>248.1>85.0<br>235.2>85.0               | 36             | 18               |
| C5<br>C4DC/C5OH<br><sup>2</sup> H <sub>9</sub> -C5                       | Valerylcarnitine/Tiglylcarnitine/Methylmalonylcarnitine/3-Hydroxy-valerylcarnitine | 246.2>85.0<br>244.2>85.0<br>262.1>85.0<br>255.2>85.0 | 38             | 20               |
| C6<br><sup>2</sup> H <sub>3</sub> -C6                                    | Hexanoylcarnitine                                                                  | 260.2>85.0<br>263.2>85.0                             | 37             | 20               |
| C5DC/C6OH<br>C6DC<br><sup>2</sup> H <sub>6</sub> -C5DC                   | Glutaryl carnitine/3-Hydroxy-hexanoylcarnitine<br>Adipyl carnitine                 | 276.2>85.0<br>290.2>85.0<br>282.2>85.0               | 40             | 24               |
| C8:1<br><sup>2</sup> H <sub>3</sub> -C8                                  | Octenoylcarnitine<br>Octanoylcarnitine                                             | 286.2>85.0<br>288.2>85.0<br>291.2>85.0               | 42             | 22               |



|                                                                                              |                                                                                                                                                                                                                                                 |                                                                                                |                       |                         |
|----------------------------------------------------------------------------------------------|-------------------------------------------------------------------------------------------------------------------------------------------------------------------------------------------------------------------------------------------------|------------------------------------------------------------------------------------------------|-----------------------|-------------------------|
| C10:1<br>C10:2<br><b><sup>2</sup>H<sub>3</sub>-C10</b>                                       | Decanoylcarnitine<br>Decadienoylcarnitine<br>Decenoylcarnitine                                                                                                                                                                                  | 316.2>85.0<br>312.2>85.0<br>314.2>85.0<br>319.3>85.0                                           | 45                    | 22                      |
| C12<br>C12:1<br><b><sup>2</sup>H<sub>3</sub>-C12</b>                                         | Dodecenoylcarnitine<br>Dodecanoylcarnitine                                                                                                                                                                                                      | 344.3>85.0<br>342.3>85.0<br>347.3>85.0                                                         | 46                    | 24                      |
| C14C14:1<br>C14:2<br>C14OH<br><b><sup>2</sup>H<sub>3</sub>-C14</b>                           | Tetradecanoylcarnitine (myristoylcarnitine)<br>Tetradecenoylcarnitine<br>Tetradecadienoylcarnitine<br>3-Hydroxy-tetradecanoylcarnitine                                                                                                          | 372.3>85.0<br>370.3>85.0<br>368.3>85.0<br>388.3>85.0<br>375.3>85.0                             | 52                    | 25                      |
| C16:1<br>C16<br>C16OH<br><b><sup>2</sup>H<sub>3</sub>-C16</b>                                | Hexadecenoylcarnitine<br>Hexadecanoylcarnitine (Palmitoylcarnitine)<br>3-Hydroxy-hexadecanoylcarnitine                                                                                                                                          | 398.3>85.0<br>400.3>85.0<br>416.3>85.0<br>403.4>85.0                                           | 55                    | 26                      |
| C16:1OH/C17<br><b><sup>2</sup>H<sub>3</sub>-C16</b>                                          | 3-Hydroxy-hexadecenoylcarnitine                                                                                                                                                                                                                 | 414.3>85.0<br>403.4>85.0                                                                       | 55                    | 26                      |
| C18<br>C18:1<br>C18:2<br>C18:1OH<br>C18OH<br>C18:2OH<br><b><sup>2</sup>H<sub>3</sub>-C18</b> | Octadecanoylcarnitine (Stearoylcarnitine)<br>Octadecenoylcarnitine (Oleylcarnitine)<br>Octadecadienoylcarnitine (Linoleylcarnitine)<br>3-Hydroxy-octadecenoylcarnitine<br>3-Hydroxy-octadecanoylcarnitine<br>3-Hydroxy-octadecadienoylcarnitine | 428.4>85.0<br>426.4>85.0<br>424.3>85.0<br>442.4>85.0<br>444.4>85.0<br>440.3>85.0<br>431.4>85.2 | 56                    | 28                      |
| C20<br><b><sup>2</sup>H<sub>3</sub>-C26</b>                                                  | Eicosanoylcarnitine (Arachidoylcarnitine)                                                                                                                                                                                                       | 456.4>85.0<br>543.5>85.0                                                                       | 69                    | 34                      |
| C22<br><b><sup>2</sup>H<sub>3</sub>-C26</b>                                                  | Docosanoylcarnitine (Behenoylcarnitine)                                                                                                                                                                                                         | 484.4>85.0<br>543.5>85.0                                                                       | 69                    | 34                      |
| C24<br><b><sup>2</sup>H<sub>3</sub>-C26</b>                                                  | Tetracosanoylcarnitine (Lignoceroylcarnitine)                                                                                                                                                                                                   | 512.5>85.0<br>543.5>85.0                                                                       | 69                    | 34                      |
| C26<br><b><sup>2</sup>H<sub>3</sub>-C26</b>                                                  | Hexacosanoylcarnitine (Cerotoylcarnitine)                                                                                                                                                                                                       | 540.5>85.0<br>543.5>85.0                                                                       | 69                    | 34                      |
| <b>Abbreviation Ketones and Internal Standards</b>                                           | <b>Ketones</b>                                                                                                                                                                                                                                  | <b>Transition</b>                                                                              | <b>Cone potential</b> | <b>Collision energy</b> |
| SA<br><b><sup>13</sup>C<sub>5</sub>-MPP<sup>2</sup></b>                                      | Succinylacetone                                                                                                                                                                                                                                 | 155.1>109.1<br>160.1>114.1                                                                     | 24                    | 22                      |
| <b>Abbreviation Nucleosides and Internal Standards</b>                                       | <b>Nucleosides</b>                                                                                                                                                                                                                              | <b>Transition</b>                                                                              | <b>Cone potential</b> | <b>Collision energy</b> |
| ADO<br><b><sup>13</sup>C<sub>5</sub>-ADO</b>                                                 | Adenosine                                                                                                                                                                                                                                       | 268.1>136.1<br>273.1>136.1                                                                     | 32                    | 18                      |
| D-ADO<br><b><sup>13</sup>C<sub>5</sub>-dADO</b>                                              | 2'-deoxyadenosine                                                                                                                                                                                                                               | 252.1>136.1<br>257.1>136.1                                                                     | 29                    | 14                      |
| <b>Abbreviation Lysophospholipids and Internal Standards</b>                                 | <b>Lysophospholipids</b>                                                                                                                                                                                                                        | <b>Transition</b>                                                                              | <b>Cone potential</b> | <b>Collision energy</b> |
| C20:0-LPC<br><b><sup>2</sup>H<sub>4</sub>-C26:0-LPC</b>                                      | C20:0 lysophosphatidylcholine                                                                                                                                                                                                                   | 552.4>104.1<br>640.5>104.1                                                                     | 74                    | 30                      |
| C22:0-LPC<br><b><sup>2</sup>H<sub>4</sub>-C26:0-LPC</b>                                      | C22:0 lysophosphatidylcholine                                                                                                                                                                                                                   | 580.4>104.1<br>640.5>104.1                                                                     | 74                    | 30                      |
| C24:0-LPC<br><b><sup>2</sup>H<sub>4</sub>-C26:0-LPC</b>                                      | C24:0 lysophosphatidylcholine                                                                                                                                                                                                                   | 608.5>104.1<br>640.5>104.1                                                                     | 74                    | 30                      |

|                                                         |                               |                            |    |    |
|---------------------------------------------------------|-------------------------------|----------------------------|----|----|
| C26:0-LPC<br><b><sup>2</sup>H<sub>4</sub>-C26:0-LPC</b> | C26:0 lysophosphatidylcholine | 636.5>104.1<br>640.5>104.1 | 74 | 30 |
|---------------------------------------------------------|-------------------------------|----------------------------|----|----|

**Table S7.** Electrospray ionization mass spectrometry (ESI-MS) acquisition parameters employed for the analysis of whole serum amino acids (AAs), free carnitine (C0), acylcarnitines (ACCs), ketones as succinylacetone (SA), nucleosides and lysophospholipids. MS/MS transitions for each analysed metabolites and the corresponding internal standard (IS, shown in bold), the optimal cone potential (V), and collision energy (eV) are shown for each analyte. The capillary potential was 3.5 kV.

**Figure S1:**

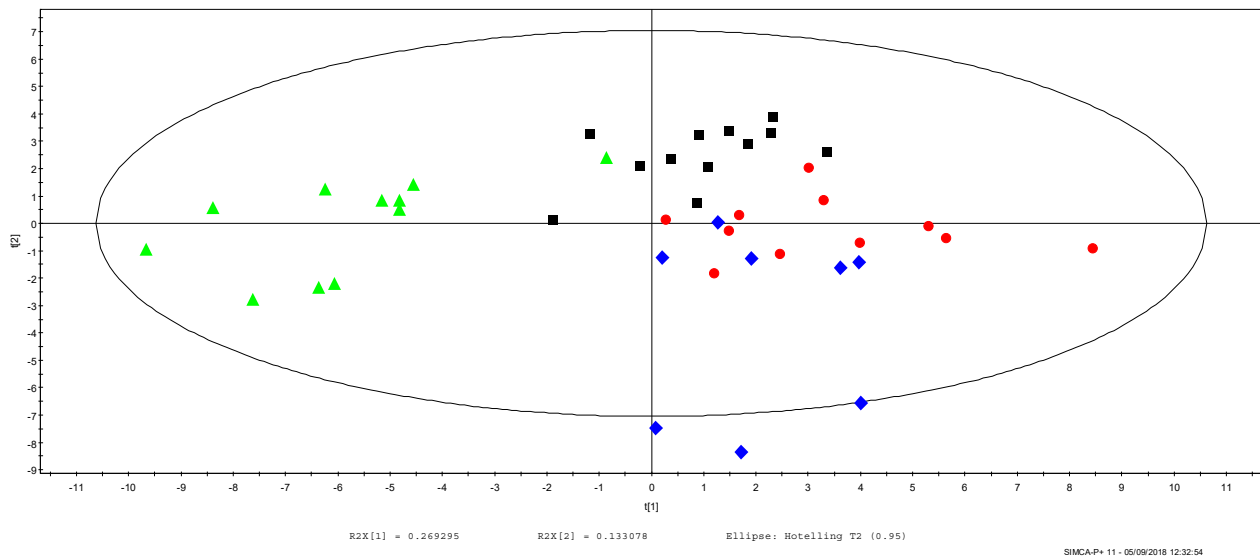

### Serum metabolomics investigation by PLS-DA

**Figure S1:** shows the Scores scatter plot calculated on two components by using 42 observations of 12 MuS cases divided into 4 different times of pregnancy groups. The classification is based on each metabolite concentration. The Partial Least Square Discriminant Analysis (PLS-DA) are used to classify serum from MuS patients in each time group as follow: black boxes (first trimester of pregnancy); red dots (second trimester of pregnancy); blue diamonds (third trimester of pregnancy); green triangle (post-partum) obtained by  $R^2Y=0.448$  and  $Q^2(\text{cum})=0.345$ .

**Figure S2**

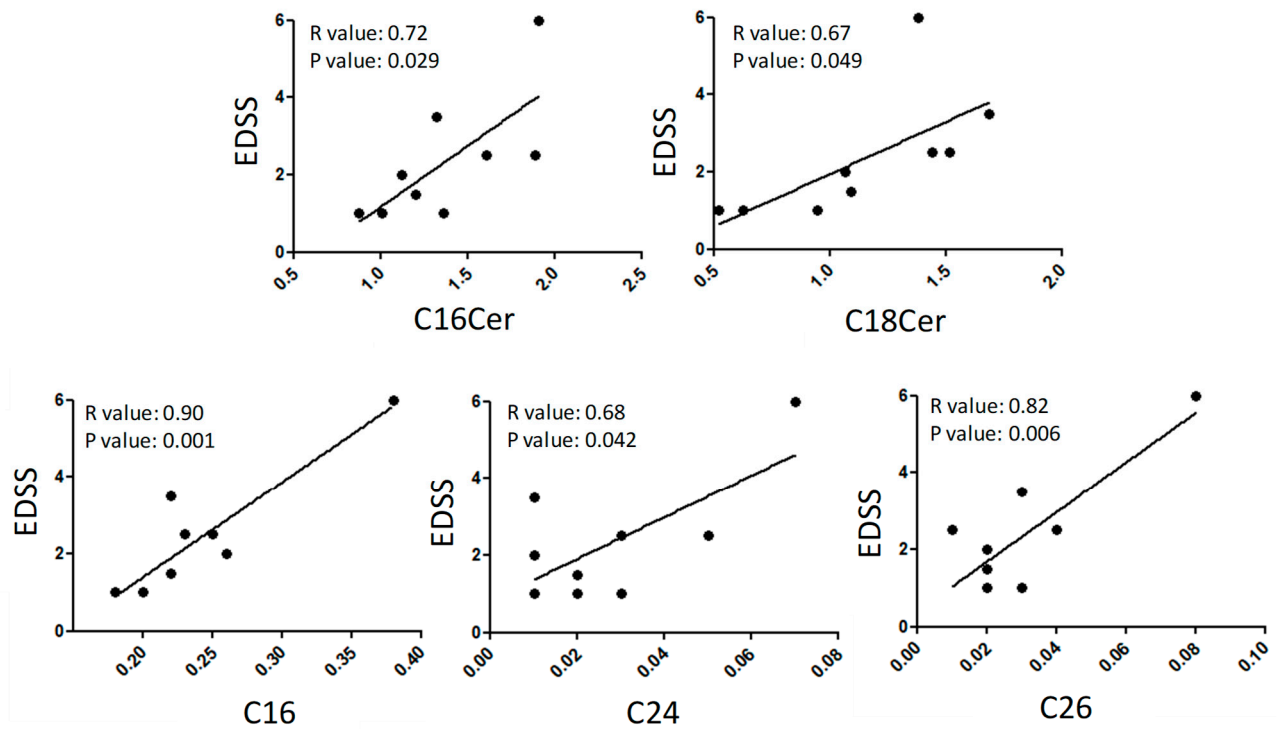

**Correlation analysis between EDSS and Metabolic Profile**

**Figure S2:** We performed Pearson correlation between EDSS and Metabolites levels in the post-partum. Correlation graphs were reported in Figure S1, showing strong correlation between EDSS and C16Cer, C18Cer, C16, C24 and C26.
